# Supplementary material for: Exogenous Antioxidants Impact on UV-Induced Changes in Membrane Phospholipids and the Effectiveness of the Endocannabinoid System in Human Skin Cells
Source: MDPI journal article supplement (doi:10.3390/antiox10081260), 2021-08-06

### Supplementary Figure S1

Full pictures of Western blot analysis of endocannabinoids receptors CB1/CB2 and pro-inflammatory factor TNF $\alpha$  expression in keratinocytes and fibroblasts exposed to UVA (30 J/cm<sup>2</sup> and 20 J/cm<sup>2</sup>, respectively) and UVB irradiation (60 mJ/cm<sup>2</sup> and 200 mJ/cm<sup>2</sup>, respectively) and treated with ascorbic acid (Asc., 100  $\mu$ M) and rutin (Rut., 25  $\mu$ M).

#### KERATINOCYTES

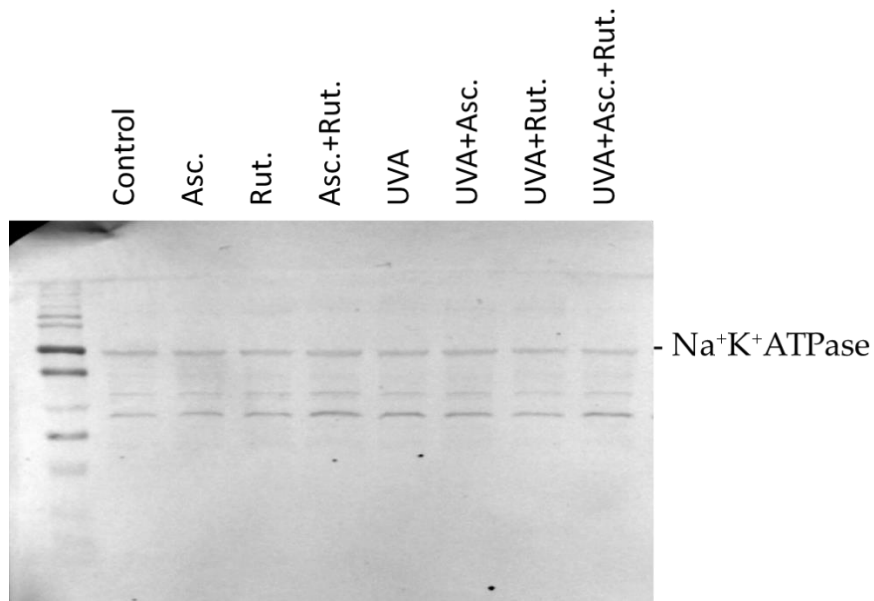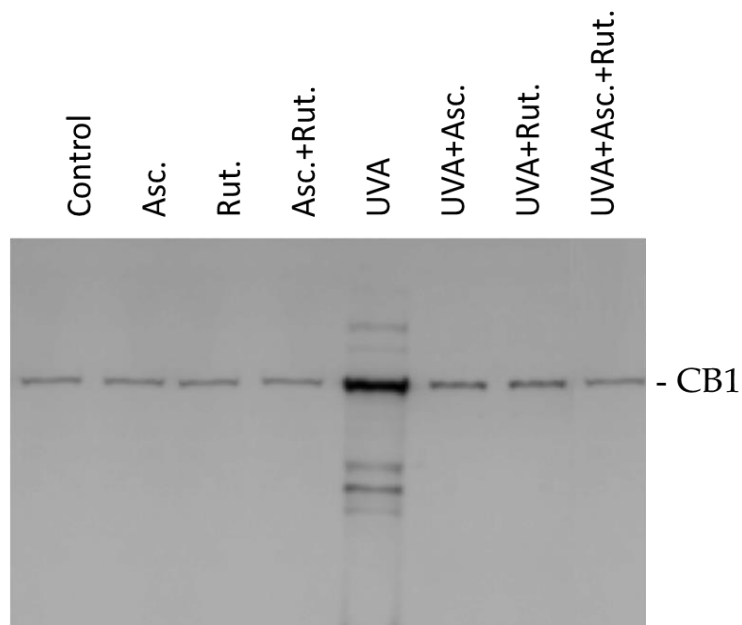

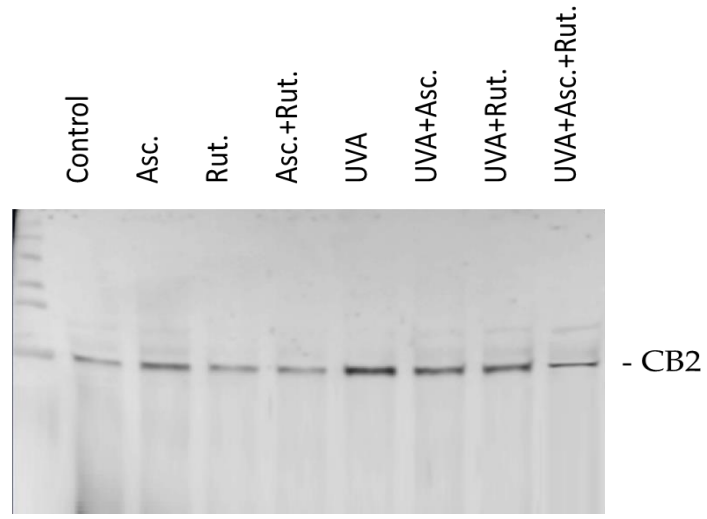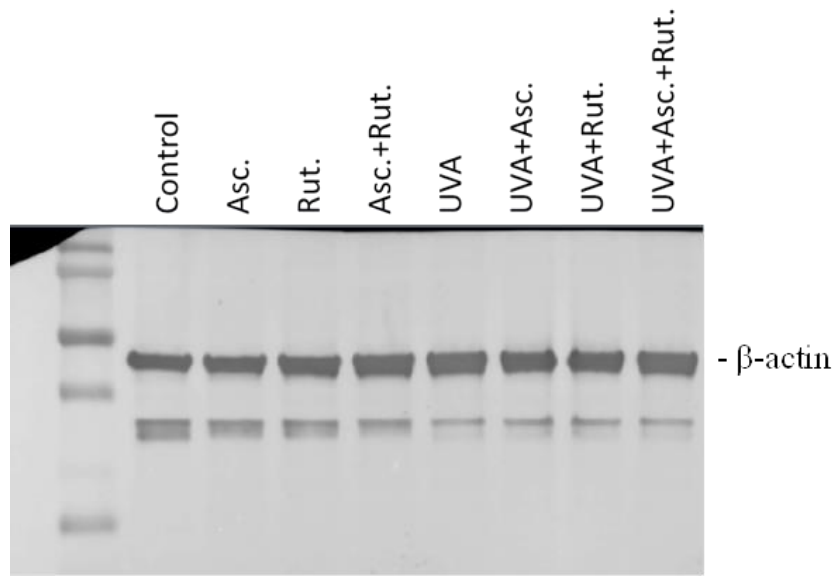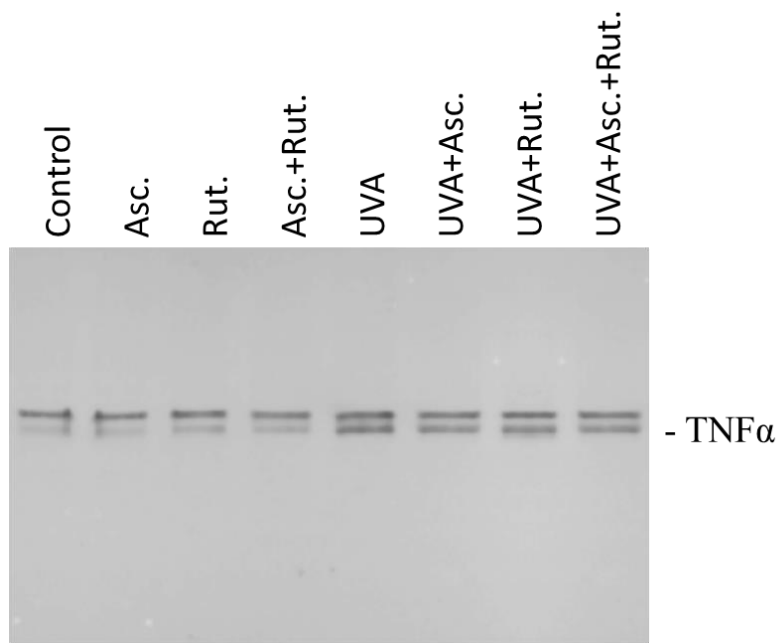

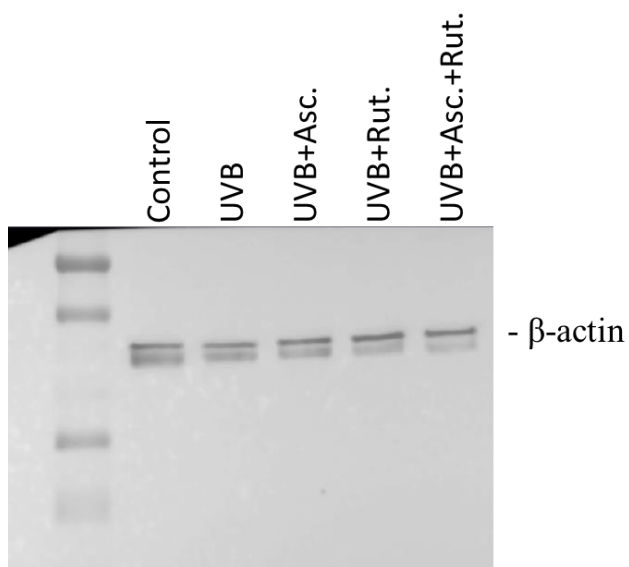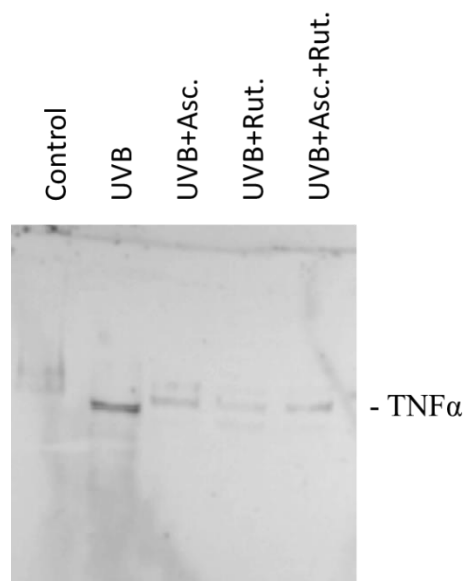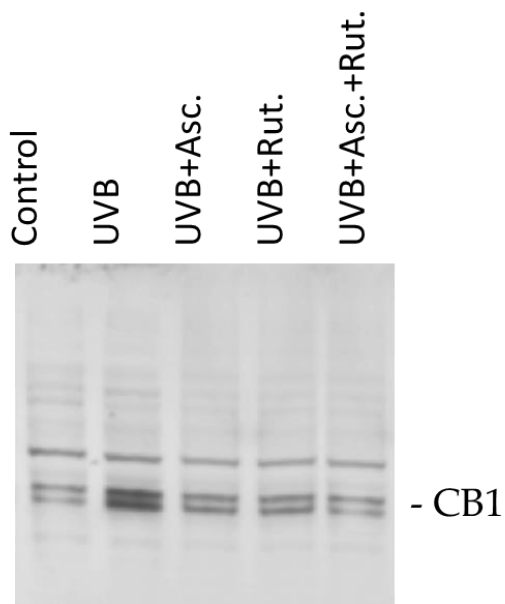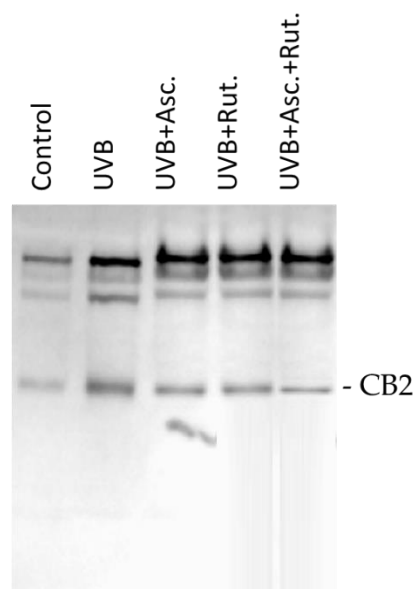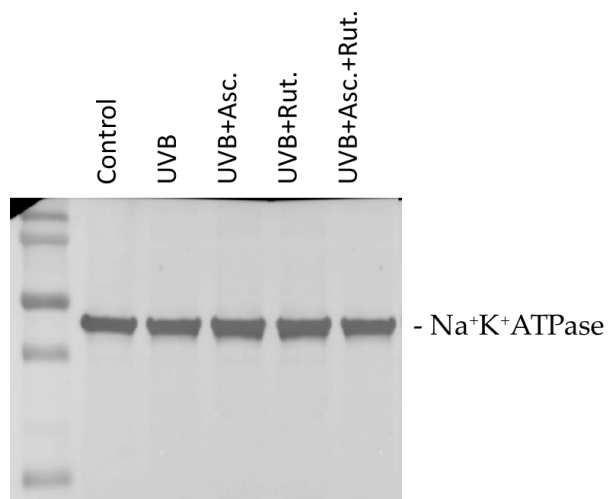

**FIBROBLASTS**

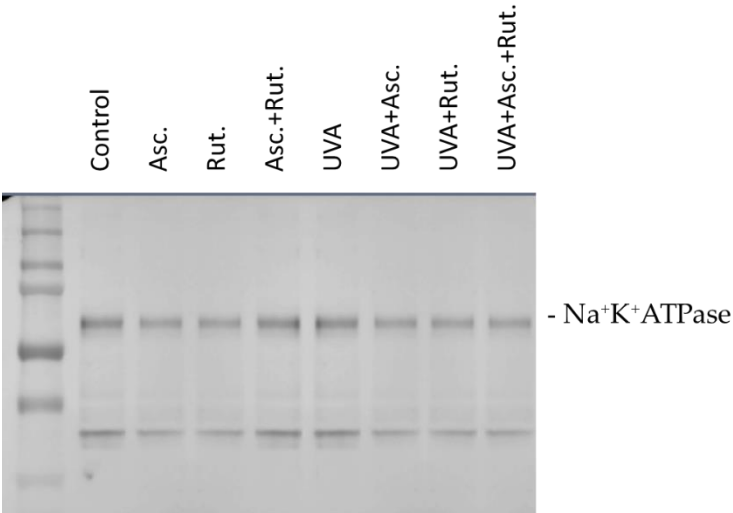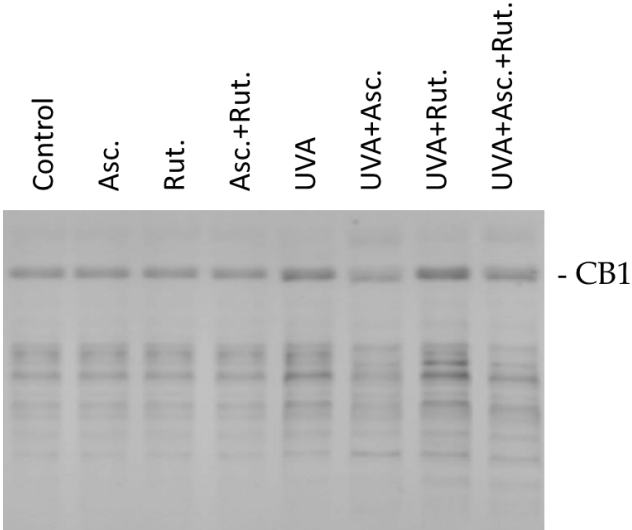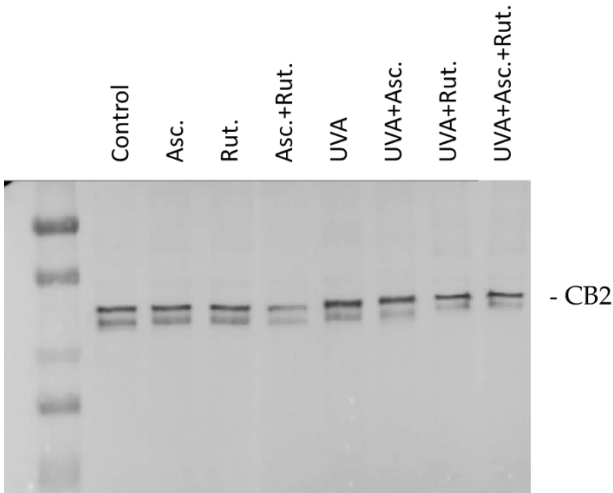

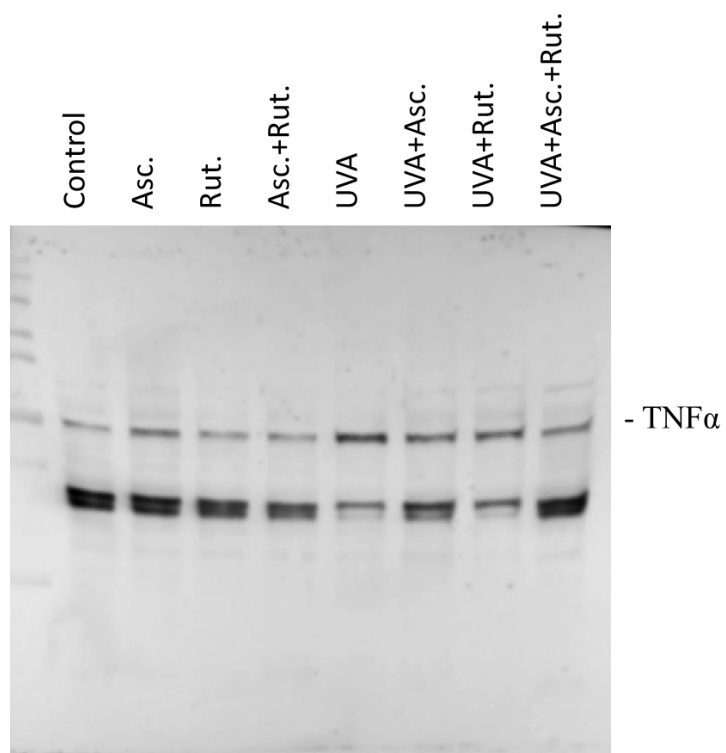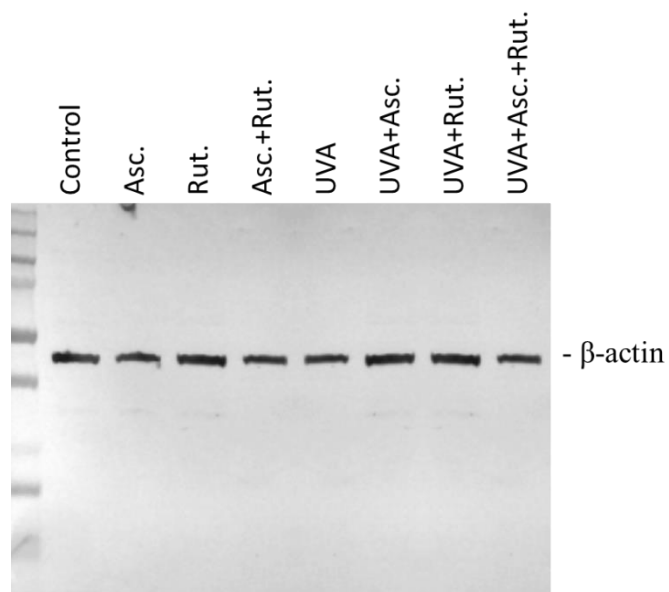

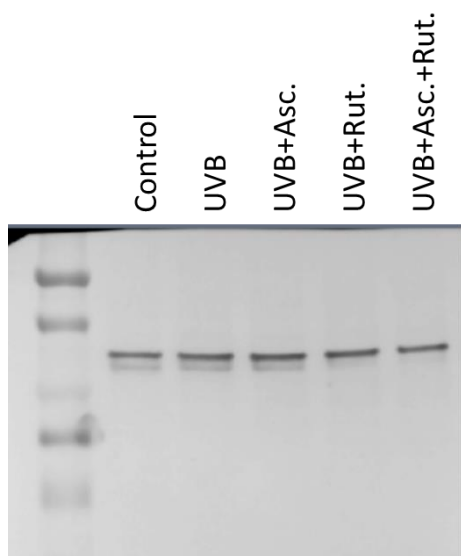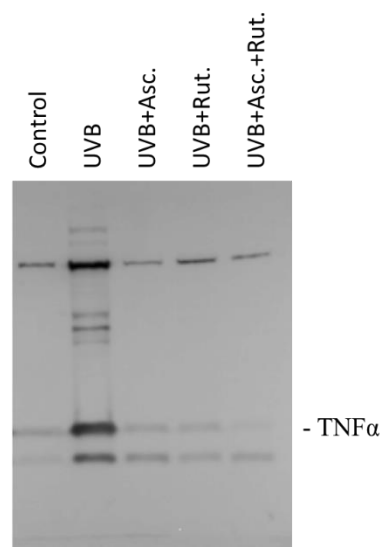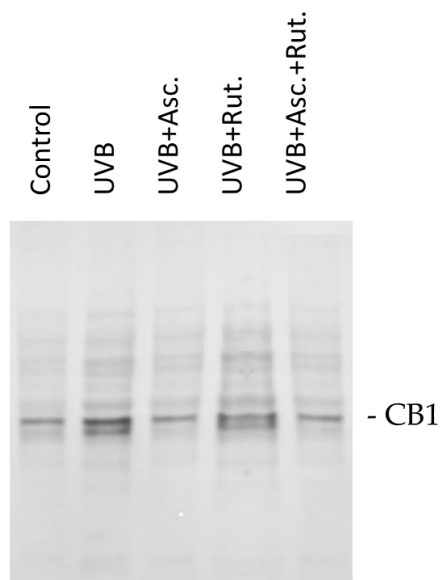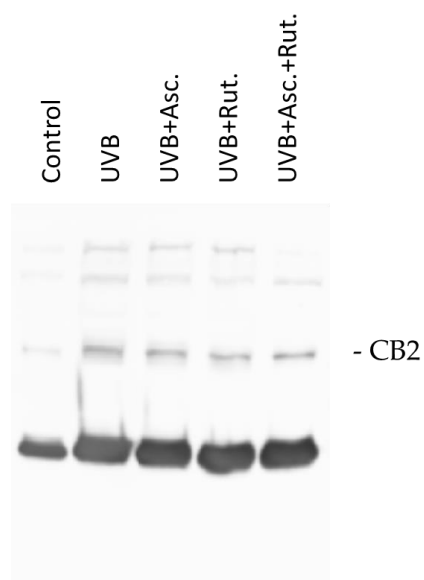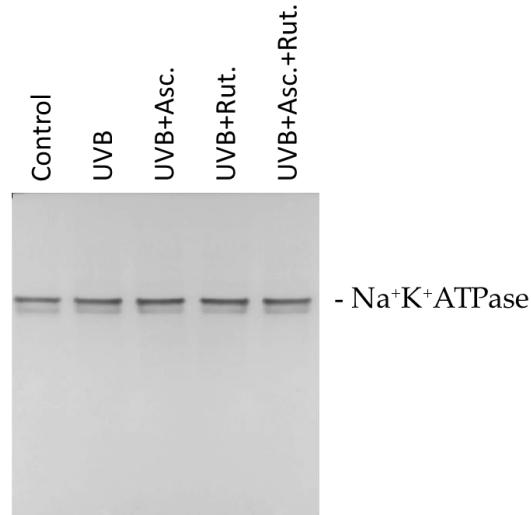

Supplement: s1 [file s1]
